# Supplementary material for: Synthesis of a Magnetic Nanostructured Composite Sorbent Only from Waste Materials
Source: MDPI journal article supplement (doi:10.3390/ma16247696), 2023-12-18
Supplement: s1 [file s1]

Supporting information for

# Synthesis of a Magnetic Nanostructured Composite Sorbent Only from Waste Materials

*Preparation of sorption solutions for pH dependent sorption studies:*

Solutions of citric acid (CA, 0.1 M) and disodium hydrogen phosphate (phosphate, 0.2 M) were prepared. According to table S1, the respective solutions were mixed and diluted to 50 mL. The buffer solution (19.5 mL) was then mixed with 0.5 mL of the CV stock solution to prepare the respective solution for the adsorption tests.

**Table S1.** volumes of stock solutions of CA and phosphate used for the respective buffer solutions.

| pH | V <sub>CA</sub> [ml] | V <sub>phosphate</sub> [ml] |
|----|----------------------|-----------------------------|
| 3  | 15.59                | 4.11                        |
| 4  | 12.29                | 7.71                        |
| 5  | 9.7                  | 10.3                        |
| 6  | 7.37                 | 12.63                       |
| 7  | 3.53                 | 16.47                       |
| 8  | 0.53                 | 19.45                       |

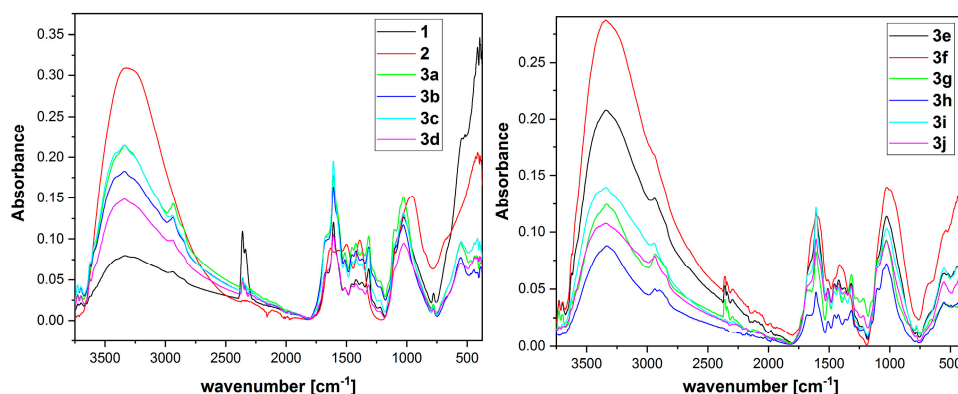

**Figure S1.** IR spectra of 1, 2 and 3 (overlaid form).

*Kinetics:*

If a specific adsorption mechanism can be described using pseudo-first order kinetics, a plot of sorption  $q_t$  vs time  $t$  should conform to the following formula:

$$q_t = q_e^* (1 - e^{-k_1 t}) \quad (S1)$$

with  $q_t$  the specific sorption capacity at a certain time  $t$ ,  $q_e$  the equilibrium sorption capacity,  $k_1$  the rate constant and  $t$  the time. This formula can also be linearized to

$$\ln(q_t - q_e) = -k_1 * t + \ln(q_e), \quad (S2)$$

however, in our case it was not necessary to use the linearized plot.

For second-order kinetics, the formula is

$$q_t = k_2 * q_e^2 * t / (1 + k_2 * q_e * t) \quad (S3)$$

with  $k_2$  the pseudo second order rate constant, which can be linearized to

$$t/q_t = 1/(k_2 * q_e^2) + t/q_e. \quad (S4)$$

Also in this case only the nonlinear form was used.

The intraparticle diffusion model assumes that the sorption capacity  $q_t$  is proportional to the square root of time, according to

$$q_t = k_{ID} * t^{0.5}, \quad (S5)$$

with  $k_{ID}$  the rate constant for the intraparticle diffusion model. Aside from this formula, there are two other variants of this model.[1] The second model adds a constant  $c$  to the equation, according to

$$q_t = k_{ID} * t^{0.5} + c \quad (S6)$$

This model assumes that there are two sorption processes involved at different times. The third model assumes there are three different intraparticle diffusion processes involved: external surface adsorption, intraparticle diffusion controlled adsorption, and near equilibrium adsorption where the pollutant moves from larger to micropores. In this case  $q_t$  needs to be plotted vs  $t^{0.5}$  and the plot divided into three linear areas.

A plot of  $q_t$  vs  $t$  was done and the four functions for pseudo-first order, pseudo-second order and two intraparticle diffusion kinetics were fitted using Origin software, with the orthogonal distance regression mode used for iteration. The reason this iteration mode was used was that due to the sample being left for some time on a magnet to remove the sorbent from the suspension, we feel that there could also be errors on the time axis, and not only on the axis displaying the sorption rate, and the fitting process needs to take this into account as well.

Additionally, for the intraparticle diffusion model a plot was done for  $q_t$  vs  $t^{0.5}$  and multiple linear fits made for different sections of the plot (Figure S1).

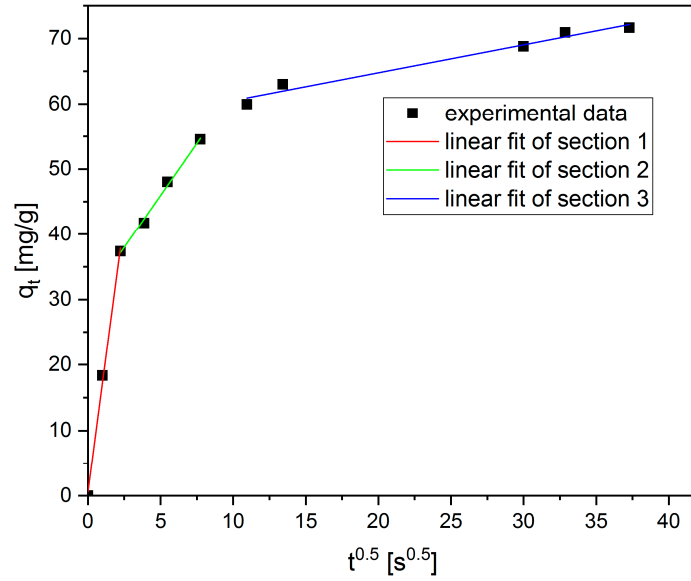

**Figure S2.** Plot of  $q_t$  vs  $t^{0.5}$  for the intraparticle diffusion model.

*Isotherms:*

The Langmuir and Freundlich models were used to attempt to describe the obtained data points. The Langmuir model can be described using the formula

$$q_e = q_{\max} * K_L * C_e / (1 + K_L * C_e) \quad (S7)$$

with  $q_e$  the equilibrium sorption capacity for a specific equilibrium concentration  $C_e$ ,  $q_{\max}$  the maximum equilibrium sorption capacity, and  $K_L$  the Langmuir constant. Also this formula can be transformed into a linear form,

$$C_e/q_e = 1/q_{\max} * C_e + 1/(K_L * C_e) \quad (S8)$$

however, in this case the fitting was done only using the nonlinear form.

The Freundlich model is described by

$$q_e = K_F * C_e^{1/n} \quad (S9)$$

with  $K_F$  the Freundlich constant and  $n$  the Freundlich exponential coefficient. The linear form would be

$$\log(q_e) = \log(K_F) + 1/n * \log(C_e). \quad (S10)$$

A plot of  $q_e$  vs  $C_e$  was done and the nonlinear functions for Langmuir and Freundlich isotherms fitted using Origin software using the orthogonal distance regression mode for iteration. The reason that this mode was chosen here was because both  $q_e$  and  $C_e$  depend on the same measurement, and thus would be subject to the same errors.

---

*Thermodynamic parameters:*

To determine the thermodynamic parameters  $\Delta G^\circ$  (Gibbs free energy change),  $\Delta S^\circ$  (entropy change) and  $\Delta H^\circ$  (enthalpy change) of the sorption process several formulas need to be combined and used. The van't Hoff equation states that

$$\Delta G^\circ = -R^*T*\ln(K^\circ) \quad (S11)$$

with R the ideal gas constant, T the temperature, and  $K^\circ$  the equilibrium constant for the sorption process. At the same time, the Gibbs free energy can be also calculated according to the Gibbs-Helmholtz equation

$$\Delta G^\circ = \Delta H^\circ - T*\Delta S^\circ \quad (S12)$$

and the equilibrium constant as

$$K^\circ = q_e / C_e \cdot C_e^\circ / q_e^\circ \quad (S13)$$

with  $C_e$  the equilibrium concentration of free pollutant (as mol/L),  $C_e^\circ = 1$  mol/L and  $q_e^\circ = 1$  mol/kg.[2] From equations S9 and S10 one gets

$$\ln(K^\circ) = \Delta S^\circ / R - \Delta H^\circ / (R^*T). \quad (S14)$$

Thus through plotting  $\ln(K^\circ)$  against  $1/T$  it is possible to calculate  $\Delta H^\circ$  and  $\Delta S^\circ$  for the sorption process.

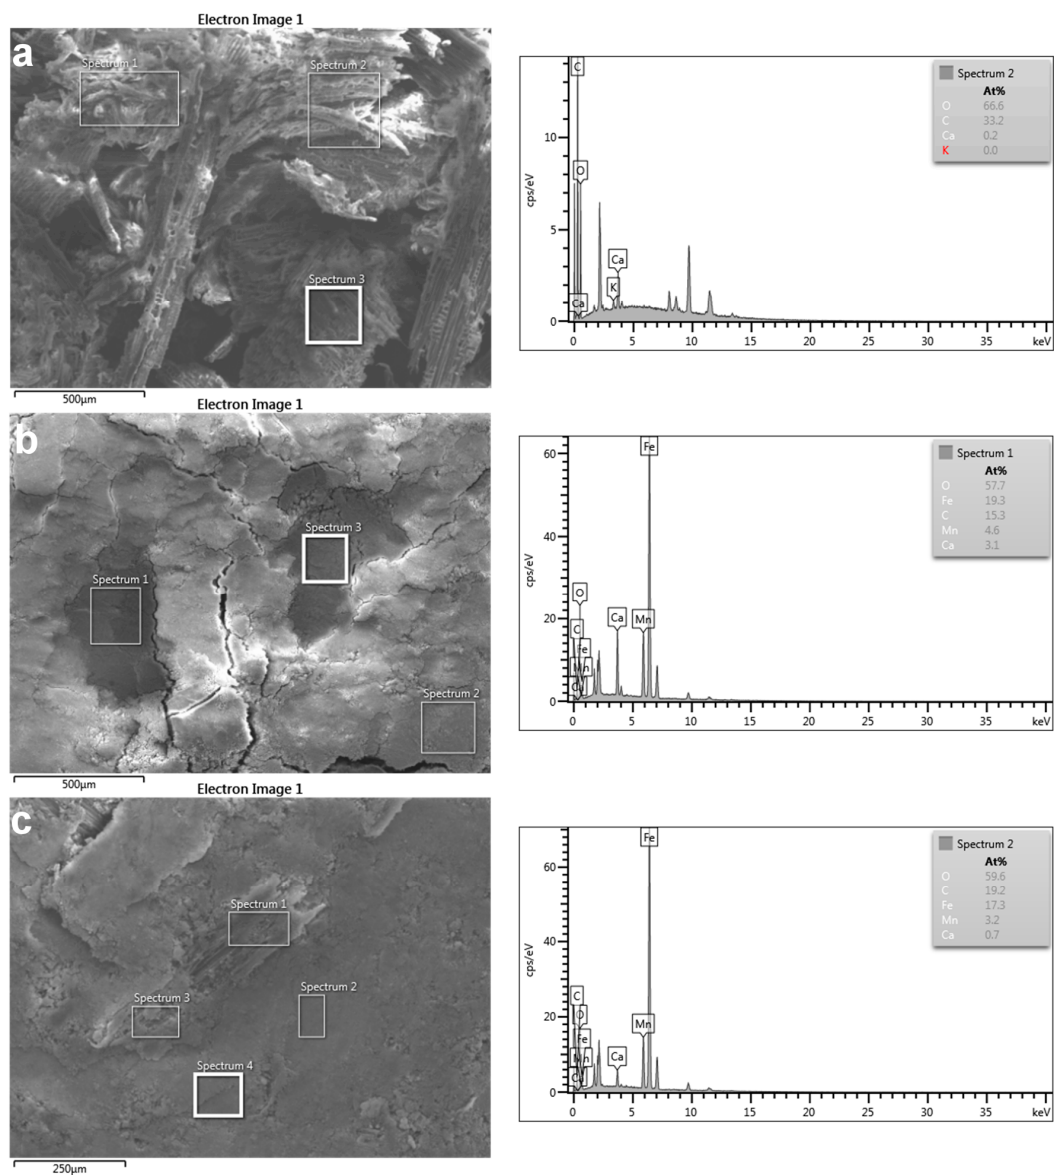

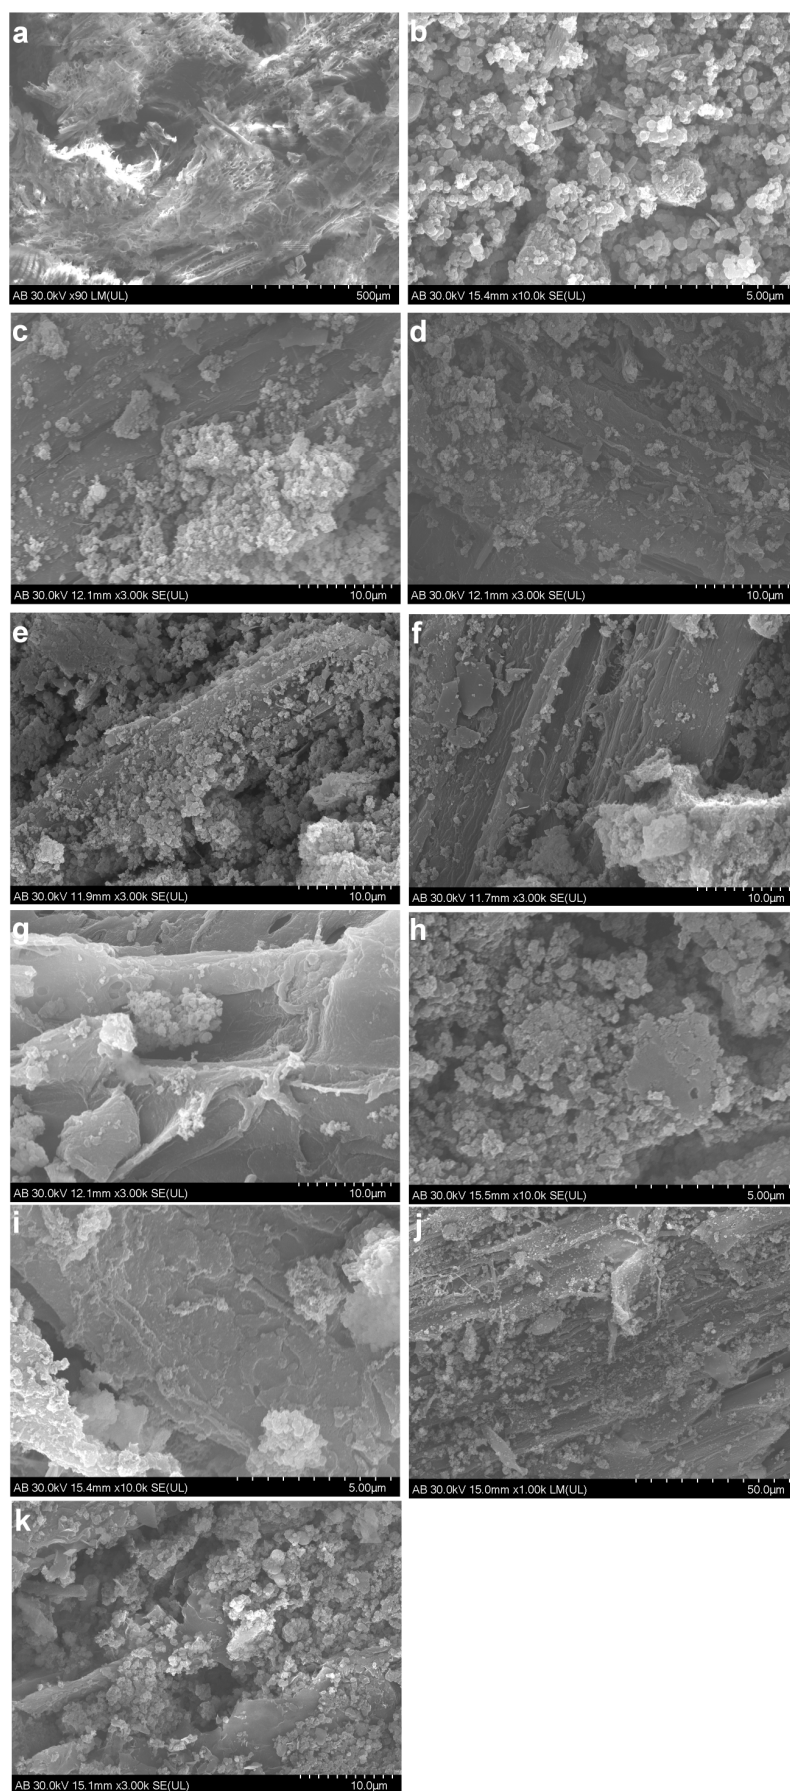

**Figure S4.** SEM of samples a) 1; b) 2; c) 3a; d) 3b; e) 3c; f) 3e; g) 3f; h) 3g; i) 3h; j) 3i; k) 3j.

**Table S2.** ratios Mn/Fe and Ca/Fe of samples **2**, **3d** and **3h** determined by EDX/XPS.

| sample    | method | ratio Mn/Fe | ratio Ca/Fe |
|-----------|--------|-------------|-------------|
| <b>2</b>  | EDX    | 0.24        | 0.16        |
| <b>3d</b> | EDX    | 0.14        | 0.03        |
| <b>3h</b> | EDX    | 0.18        | 0.04        |
| <b>3d</b> | XPS    | 0.28        | 0.17        |

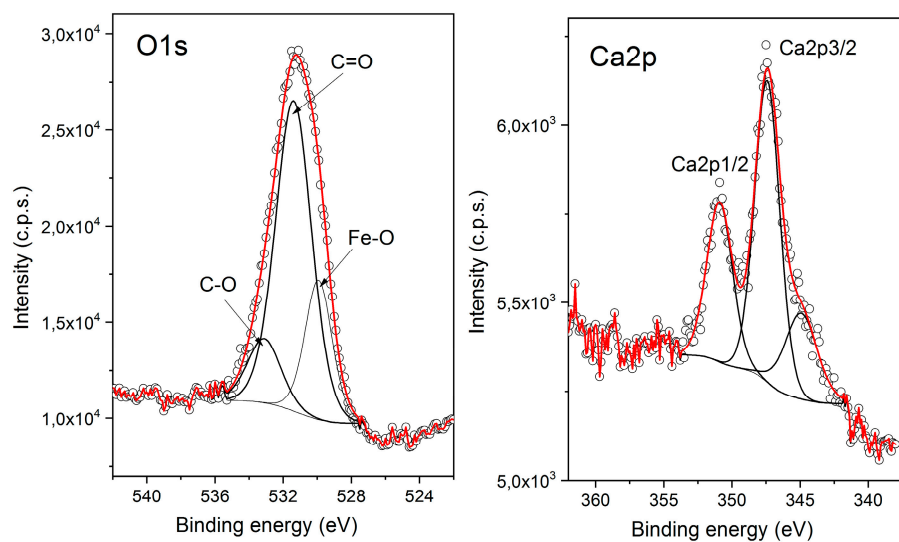

**Figure S5.** XPS O1s (left) and Ca2p (right) core level spectra of sample **3d**.

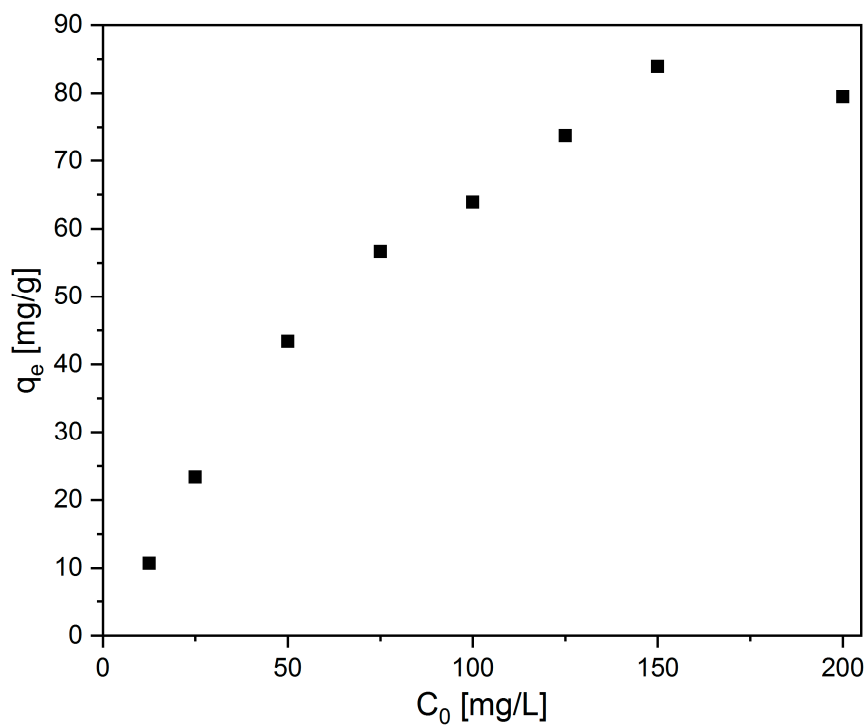

**Figure S6.** Plot of sorption capacity depending on initial concentration.

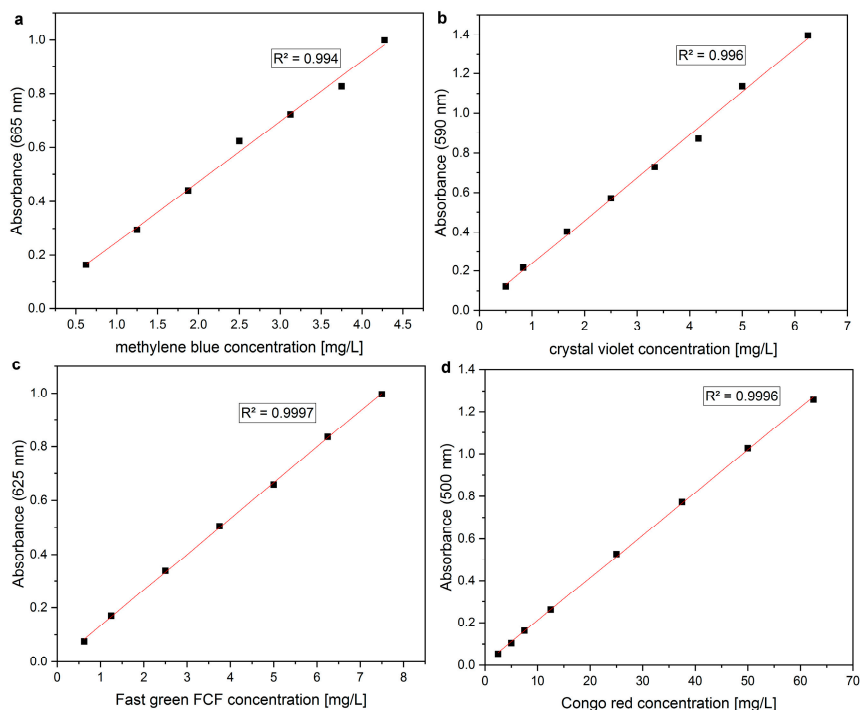

**Figure S7.** Calibration curves for a) methylene blue, b) crystal violet, c) fast green FCF and d) congo red

## References

1. Wu, F.-C.; Tseng, R.-L.; Juang, R.-S. Initial behavior of intraparticle diffusion model used in the description of adsorption kinetics. *Chemical Engineering Journal* **2009**, *153*, 1-8, doi:<https://doi.org/10.1016/j.cej.2009.04.042>.
2. Chen, T.; Da, T.; Ma, Y. Reasonable calculation of the thermodynamic parameters from adsorption equilibrium constant. *Journal of Molecular Liquids* **2021**, *322*, 114980, doi:<https://doi.org/10.1016/j.molliq.2020.114980>.
